# Supplementary material for: Complex electric double layers in charged topological colloids
Source: PubMed Central journal article supplement (PMC6147863; doi:10.1038/s41598-018-32550-8), 2018-09-20
Supplement: 41598_2018_32550_MOESM1_ESM.pdf [file 41598_2018_32550_MOESM1_ESM.pdf]

# Supplementary material: Complex electric double layers in charged topological colloids

J. C. Everts<sup>1,\*</sup> and M. Ravnik<sup>1,2</sup>

<sup>1</sup>*Department of Physics, Faculty of Mathematics and Physics,  
University of Ljubljana, Jadranska 19, 1000 Ljubljana, Slovenia*

<sup>2</sup>*Department of Condensed Matter Physics,  
Jozef Stefan Institute, Jamova 39, 1000 Ljubljana, Slovenia*

(Dated: August 7, 2018)

---

\* [jeffrey.everts@gmail.com](mailto:jeffrey.everts@gmail.com)

**Constant-charge boundary conditions** In this paper we focussed on constant-potential boundary conditions, see Eq. (2) main text, which resulted in an inhomogeneous surface charge distribution on the particle. If we would instead fix the surface charge density  $\sigma$  to be spatially constant, however, the surface potential is inhomogeneous. In this case the constant-charge boundary condition reads

$$\mathbf{n} \cdot \left( \frac{\epsilon_p}{\epsilon_s} \right) \nabla \phi(\mathbf{r})|_{\text{in}} - \mathbf{n} \cdot \nabla \phi(\mathbf{r})|_{\text{out}} = 4\pi\lambda_B\sigma, \quad \mathbf{r} \in \Gamma,$$

with  $\epsilon_p$  the dielectric constant of the particle and  $\epsilon_s$  the dielectric constant of the surrounding solvent. The exact ratio  $\epsilon_p/\epsilon_s$  only affects the surface potential by a few percent, so we fixed it at  $\epsilon_p = 2.6$  (PMMA) and  $\epsilon_s = 80$  (water), although the exact values are irrelevant within the numerical accuracy that we are interested in. Note, moreover, that for constant-potential boundary conditions the inner gradient vanishes,  $\nabla\phi|_{\text{in}} = 0$ .

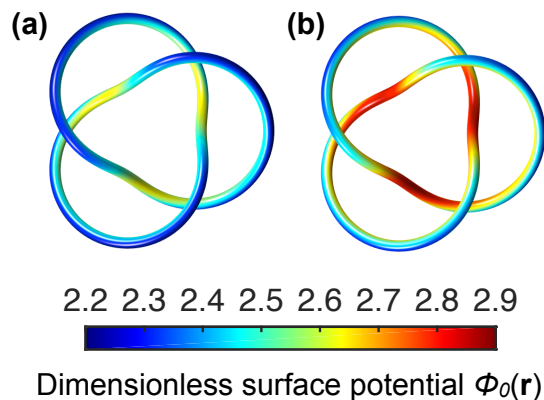

**Figure S1: Surface potential distribution  $\Phi_0(\mathbf{r})$  for constant-charge boundary conditions.** We use the same parameters as in Figure 3 for a trefoil knot particle, however with a fixed surface charge density  $\sigma$  that coincides with the maximal surface charge density  $\sigma_{\text{max}}$  from Figure 3(a) and (b), respectively. Specifically, in (a) we have  $\sigma a\lambda_B = 0.083$  and Debye length  $\lambda_D = 7.4a$ , with  $a$  the tube radius and  $\lambda_B$  the Bjerrum length. In (b) we have  $\sigma a\lambda_B = 0.068$  and  $\lambda_D = 11.6a$ .

We demonstrate the constant-charge boundary conditions for a trefoil knot particle where we choose  $\sigma$  such that it coincides with the maximal charge density  $\sigma_{\text{max}}$  of the constant-potential particle in Figure 3. In Figure S1 we see that the resulting surface potential distribution  $\Phi_0(\mathbf{r})$  is lowest at the outer rim of the particle tube and close to particle-tube crossings. This is in line with results for spherical particles where it is known that constant-charge particles at low volume fraction have a lower surface potential than at high volume

fractions [1].

Finally, we observed that the topological transformation is exactly the same as in Figure 3 (not shown since isosurfaces are identical as in Figure 3(e)), albeit the transition between different topological shapes occur at slightly different Debye lengths. The only difference with the constant-potential result is therefore that isosurfaces of the screening cloud close to the particle surface might not enclose the whole particle, which is an immediate result of the inhomogenous surface-potential distribution  $\Phi_0(\mathbf{r})$ .

**Screening cloud isosurfaces** In Supplementary movie 1 we show the isosurfaces of Figure 3(e) in the main text from various camera angles.

**Surface charge density of torus knots** In Figure S2 we show the charging behaviour of the torus knots discussed in the main text in Figure 4.

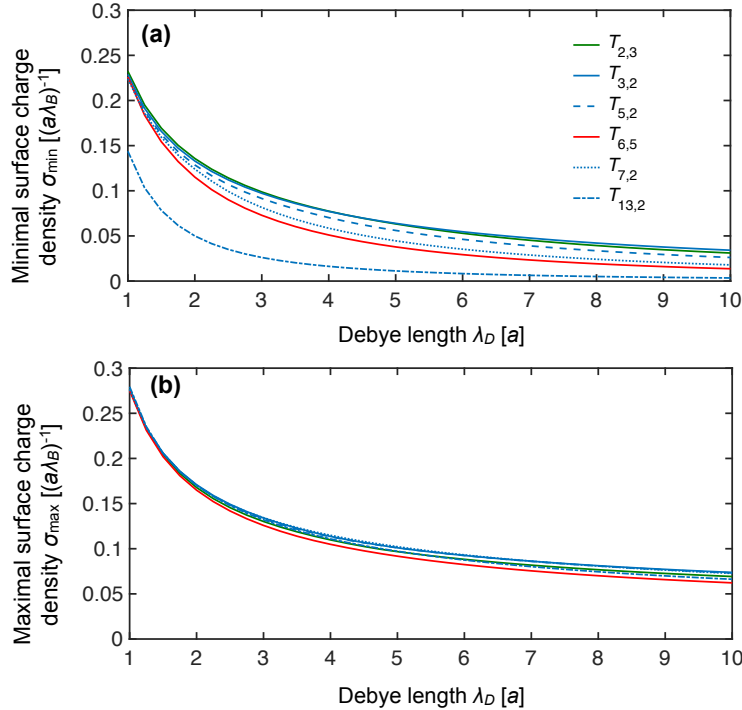

**Figure S2:** (a) Minimal and (b) maximal values of the surface charge density  $\sigma_{\min}$  and  $\sigma_{\max}$ , respectively for various torus knots  $T_{p,q}$  for a range of Debye lengths  $\lambda_D$  with the same parameters as in Fig. 4. Here  $a$  is the tube radius of the torus knot, and  $\lambda_B$  is the Bjerrum length of the medium.

- 
- [1] Everts, J. C., Boon, N. & van Roij, R. Density-induced reentrant melting of colloidal wigner crystals. *Phys. Chem. Chem. Phys.* **18**, 5211–5218 (2016).
